# Supplementary material
Source: PubMed Central journal article supplement (PMC3463325)

**Table S1****Wnt signaling pathway inhibitors library**

| Inhibitor | Product Name                             | Target                                                                                                              |
|-----------|------------------------------------------|---------------------------------------------------------------------------------------------------------------------|
| A         | Casein Kinase I Inhibitor, D4476         | CK1                                                                                                                 |
| B         | Casein Kinase II Inhibitor III, TBCA     | CK2                                                                                                                 |
| C         | $\beta$ -Catenin/Tcf Inhibitor, FH535    | Wnt/ $\beta$ -catenin                                                                                               |
| D         | GSK-3 Inhibitor IX                       | GSK-3 $\alpha$ / $\beta$                                                                                            |
| E         | PKG I $\alpha$ Inhibitor, Cell-Permeable | protein kinase G I $\alpha$                                                                                         |
| F         | H-89, Dihydrochloride                    | protein kinase A                                                                                                    |
| G         | JNK Inhibitor II                         | c-Jun N-terminal kinase (JNK)                                                                                       |
| H         | K-252a, Nocardiosis sp.                  | CaM kinase II . Also inhibits myosin light chain kinase, protein kinase A , protein kinase C , and protein kinase G |
| I         | KN-93                                    | CaM kinase II                                                                                                       |
| J         | LY 294002                                | phosphatidylinositol 3-kinase inhibitor                                                                             |
| K         | (5Z)-7-Oxozeaenol, Curvularia sp.        | MAPKKK TAK1 activity                                                                                                |
| L         | PP2                                      | Src family of protein tyrosine kinases. Inhibits p56lck , p59fynT , Hck , and Src .                                 |
| M         | Rapamycin                                | p70 S6 kinase . Prevents the translational activation of IGF-II.                                                    |
| N         | SB 202190                                | p38 MAP kinase                                                                                                      |
| O         | U0126                                    | MEK1 and MEK2                                                                                                       |

**Figure S1**

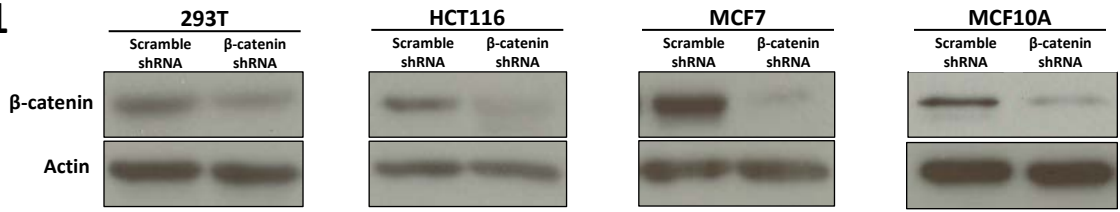

**Figure S2**

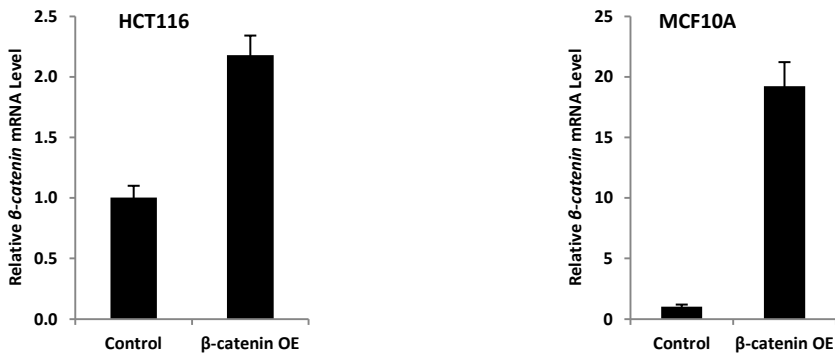

**Figure S3**

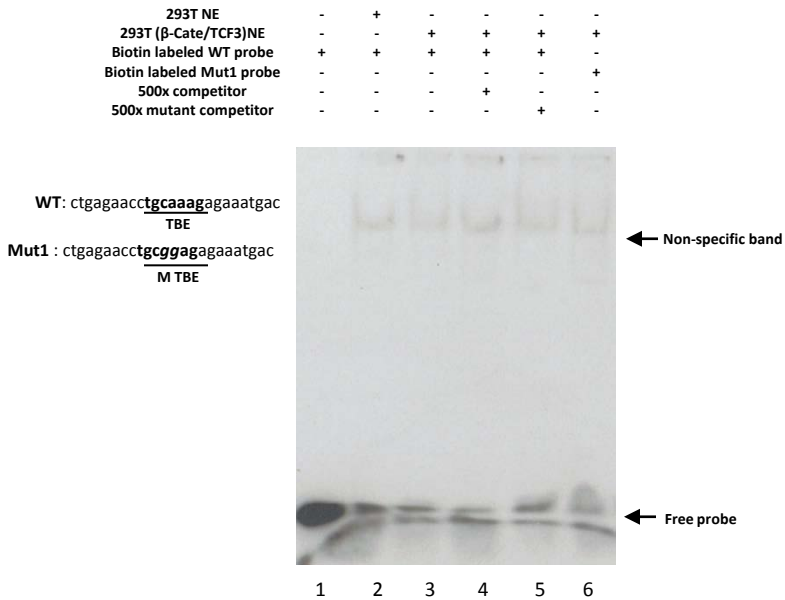

**Figure S4**

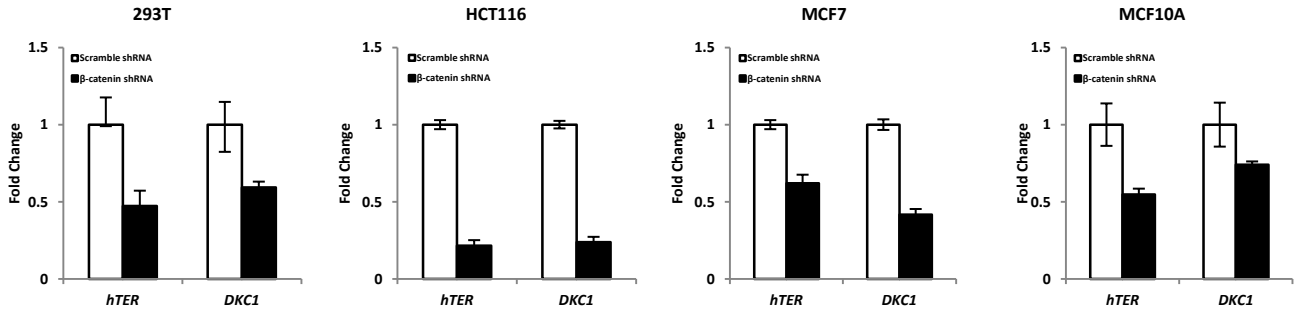

**Figure S5**

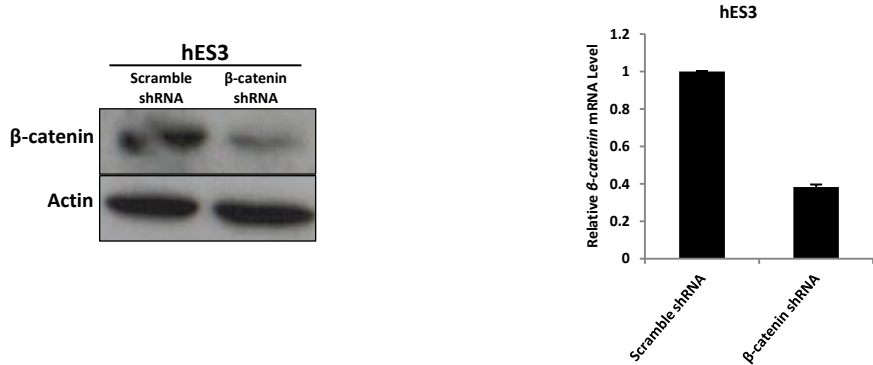

**Figure S6**

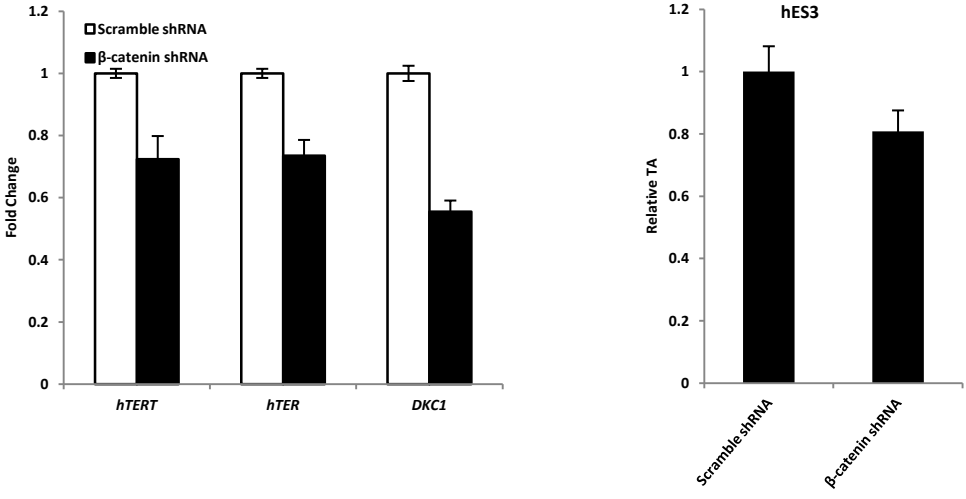

**Figure S7**

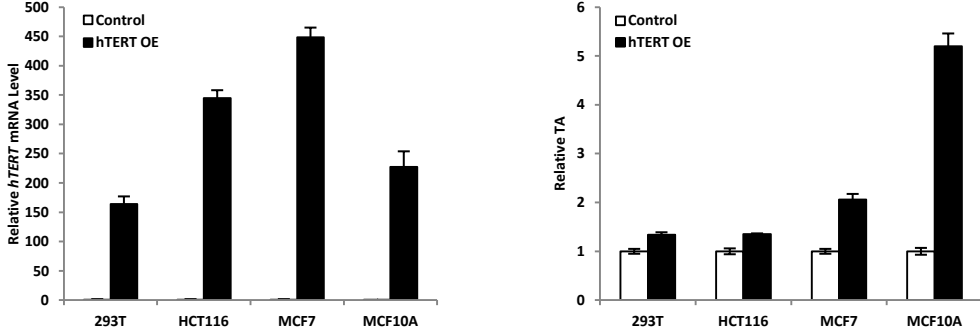

**Figure S8**

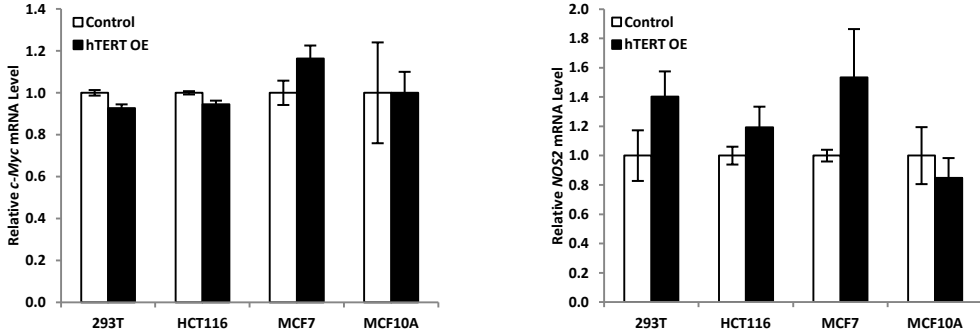

Supplement: supp_M112.368282_jbc.M112.368282-2.pdf [file supp_M112.368282_jbc.M112.368282-2.pdf]
